# Supplementary material for: Soil microbial biomass and function are altered by 12 years of crop rotation
Source: Copernicus journal article supplement (doi:10.5194/soil-2-583-2016), 2016-11-02
Supplement: Supplementary file 1 [file soil-2-583-2016-supplement.pdf]

Supplement of SOIL, 2, 583–599, 2016  
<http://www.soil-journal.net/2/583/2016/>  
doi:10.5194/soil-2-583-2016-supplement  
© Author(s) 2016. CC Attribution 3.0 License.

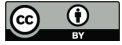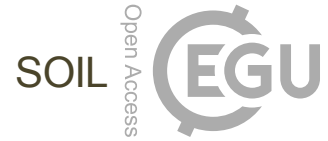

*Supplement of*

## **Soil microbial biomass and function are altered by 12 years of crop rotation**

**Marshall D. McDaniel and A. Stuart Grandy**

*Correspondence to:* Marshall D. McDaniel (marsh@iastate.edu)

The copyright of individual parts of the supplement might differ from the CC-BY 3.0 licence.

# Cropping Biodiversity Gradient Kellogg Biological Station LTER

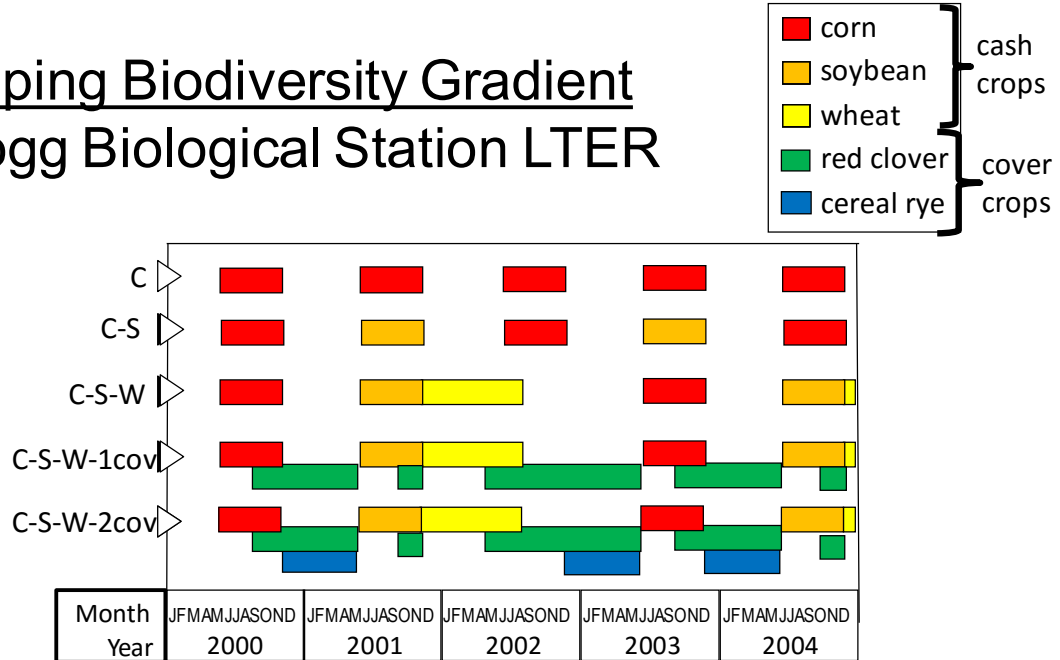

Figure S1. Schematic diagram showing the crop sequences for the five crop rotation treatments sampled in this study. This figure was adapted from Smith et al. (2008), where more details on the cropping systems can be found.

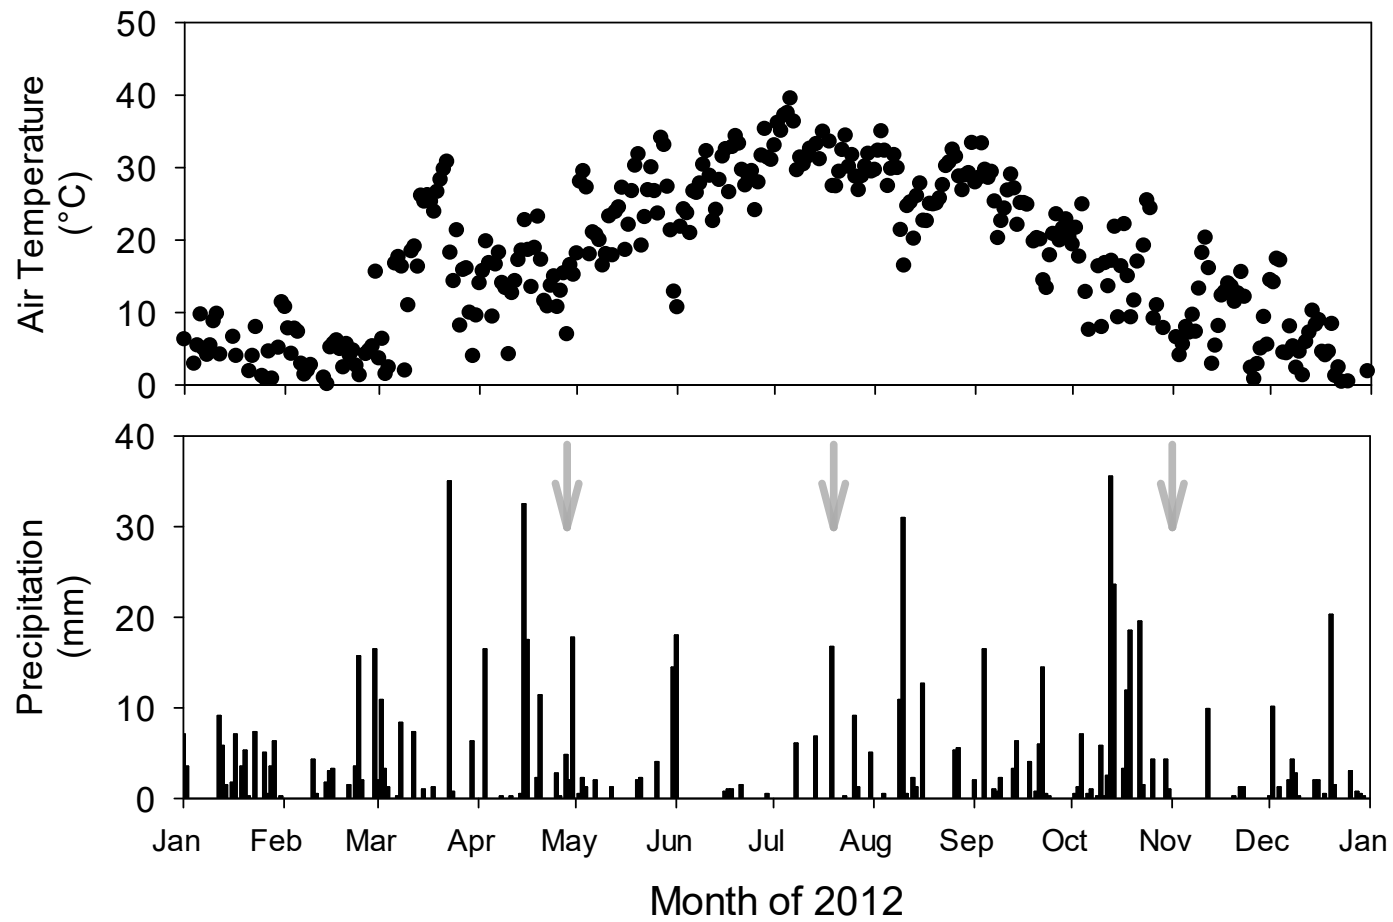

Figure S2. Daily air temperatures (Top Panel) and precipitation (Bottom Panel) from the W.K. Kellogg Biological Station Long-term Ecological Research station (KBS 2013). Dark gray down-arrows indicate when spring, summer, and autumn samples were collected.

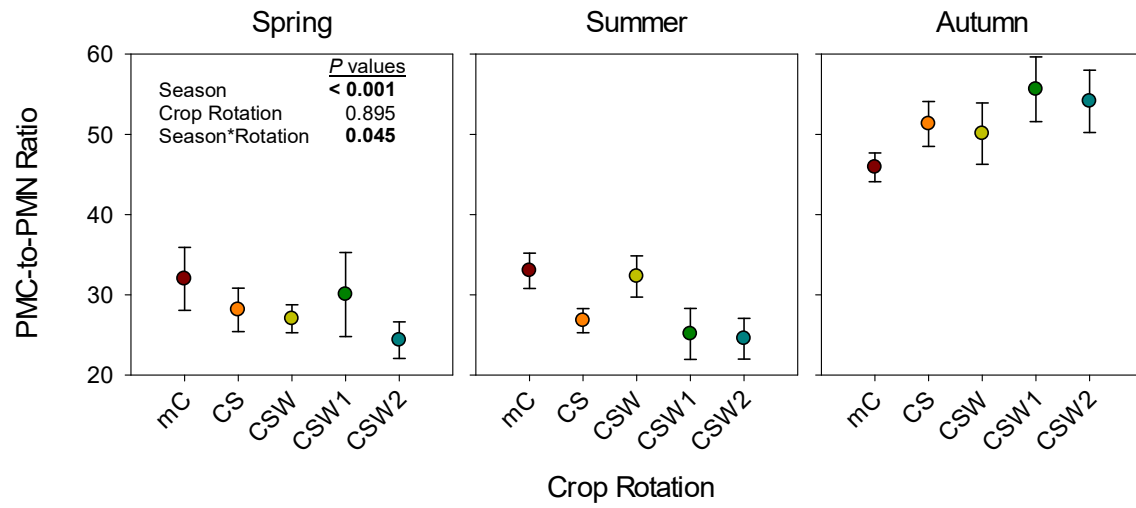

Figure S3. The potentially mineralizable C to potentially mineralizable net N ratio. See Fig. S3 for crop rotation abbreviations. Means are shown and error bars are standard errors (n = 4).

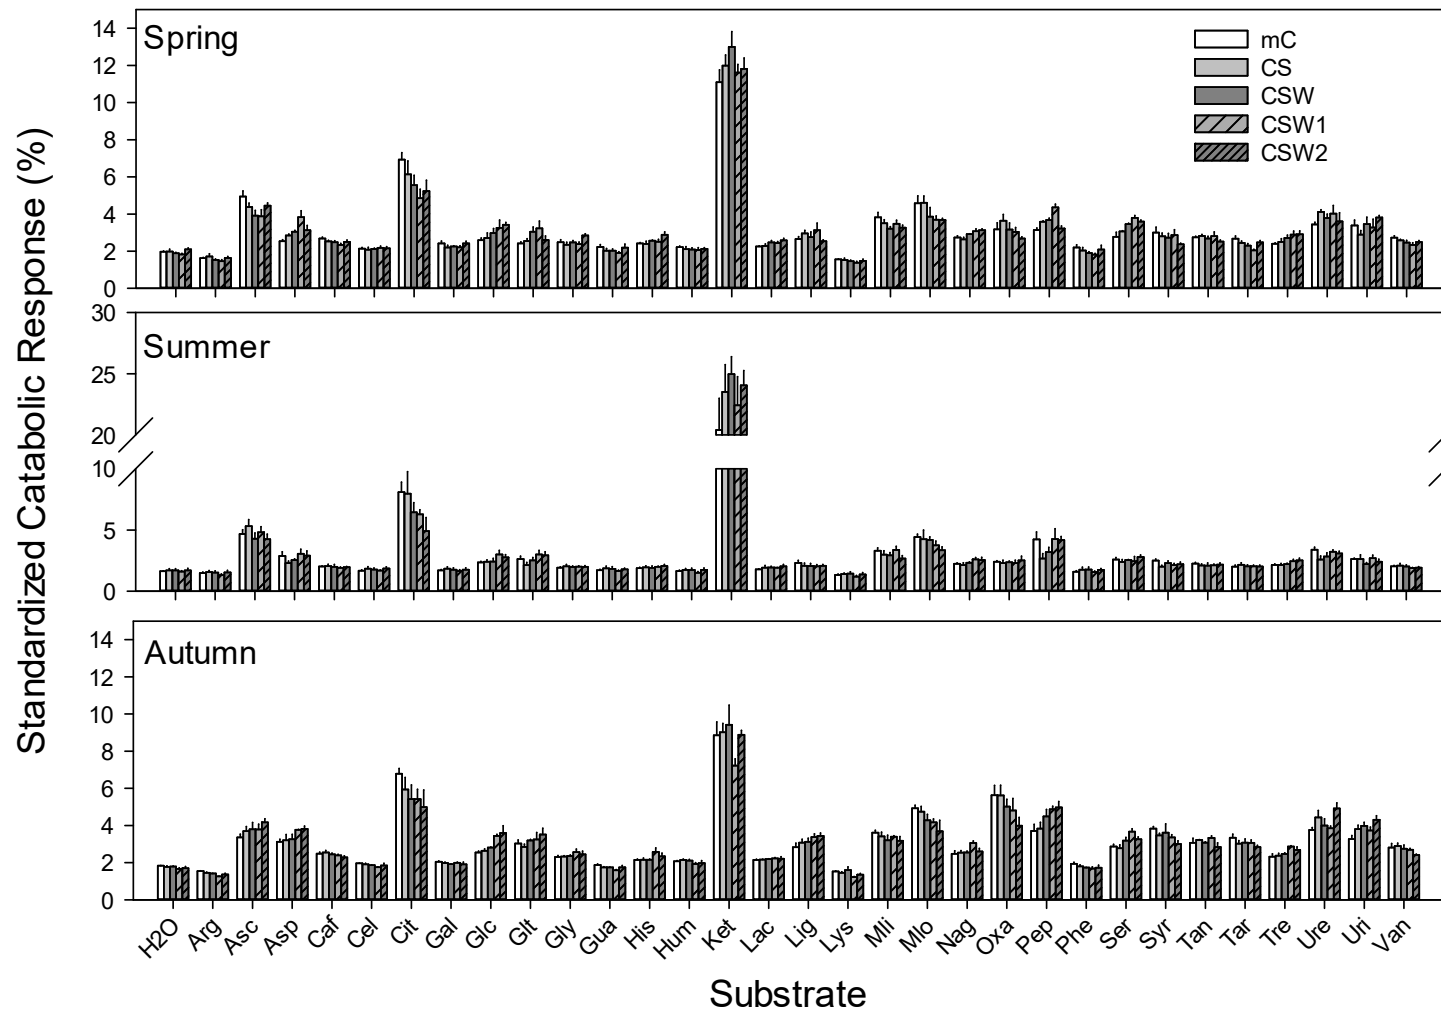

Figure S4. Standardized catabolic response (Respiration rate of Specific Substrate / Respiration rate of All Substrates \* 100). Respiration rates were in units of  $\mu\text{g CO}_2\text{-C}$  per gram of dry soil. For substrate abbreviations see Table 1 in manuscript.

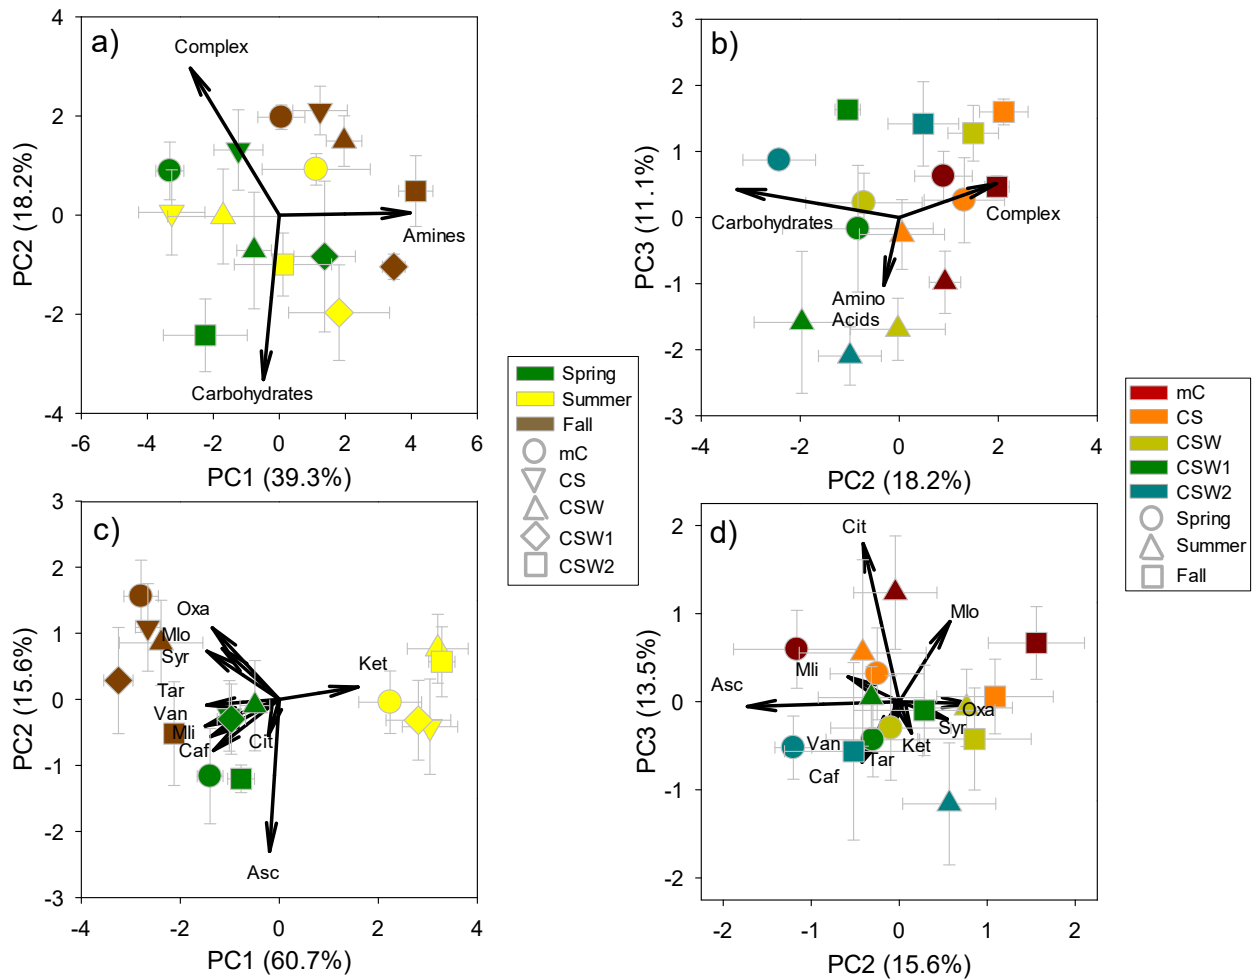

Figure S5. Principal components analysis (PCA) on all substrates except for carboxylic acids [a and b)] and only carboxylic acids [c) and d)]. Principal components 1 and 2 [a) and c)], where Season is dominant discriminating factor ( $P < 0.001$ ) and Principal components 2 and 3 [b) and d)] where Rotation is highlighted as a dominant discriminating factor. See also Table 5 for PCA and ANOVA results. Crop rotation abbreviations are: monoculture corn (mC), corn-soy (CS), corn-soy-wheat (CSW), corn-soy-wheat with red clover cover crop (CSW1), and corn-soy-wheat with red clover + rye cover crops (CSW2). The carboxylic acid abbreviations are: ascorbic acid (Asc), caffeic acid (Caf), citric acid (Cit), ketobutyric acid (Ket), malic acid (Mli), malonic acid (Mlo), oxalic acid (Oxa), syringic acid (Syr), tartaric acid (Tar), and vanillic acid (Van). Data are means ( $n = 4$ ) with standard errors of PC loading values.

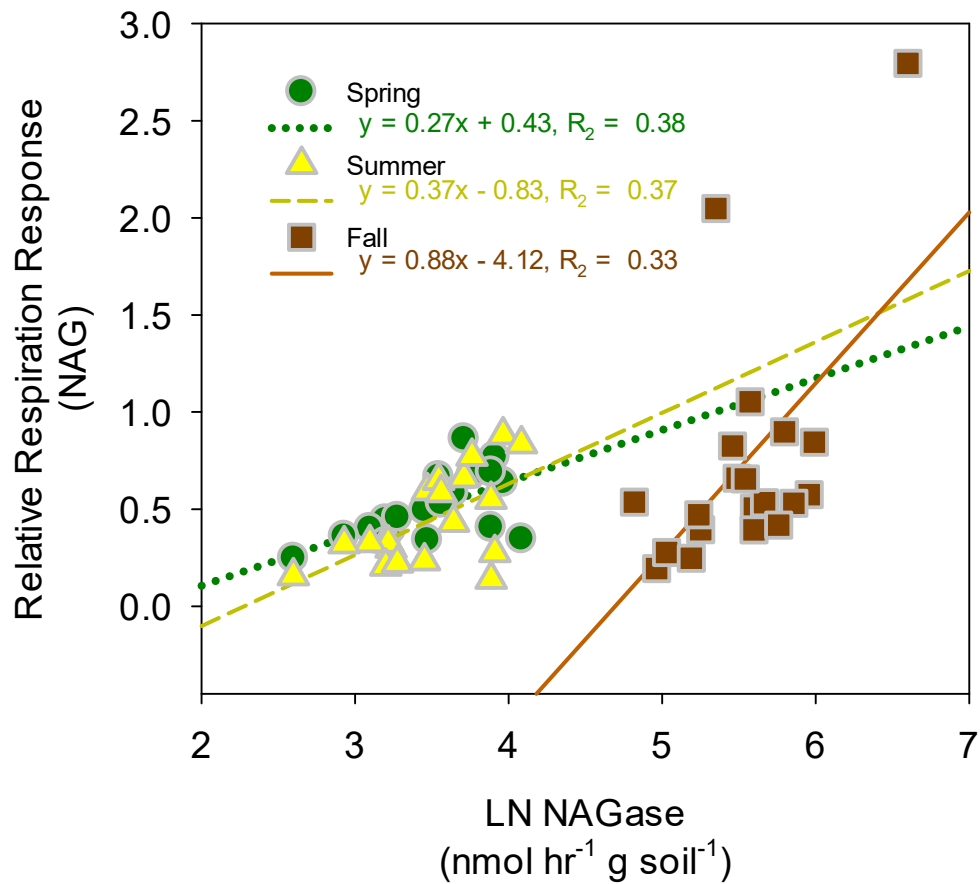

Figure S6. Regression between NAGase enzyme activity and respiration response to adding NAG. Log normal (LN) N-acetyl glucosaminidase extracellular enzyme activity, on the x-axis, and the N-acetyl glucosamine Relative Respiration Response  $[(R_{\text{sub}} - R_{\text{H}_2\text{O}}) / R_{\text{H}_2\text{O}}]$  from the community-level physiological profile data, on the y-axis. Lines are linear regressions through the data (all  $P$  values on fits were less than 0.008).

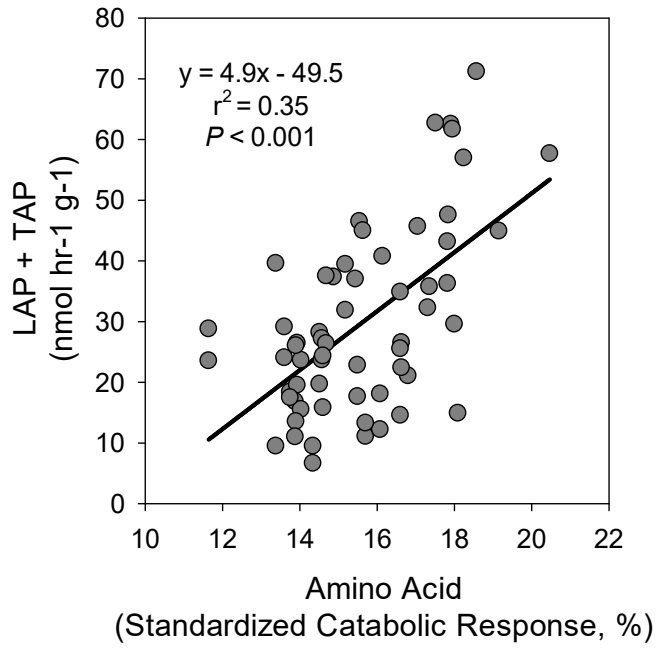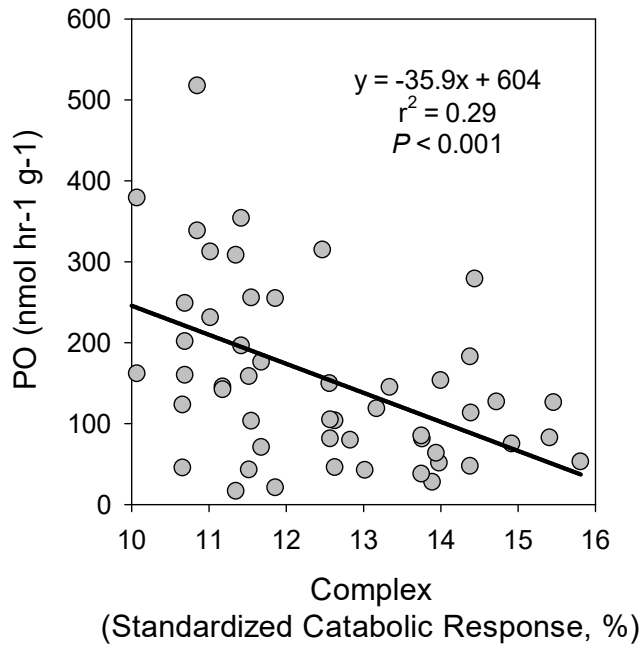

Figure S7. Relationships between substrate guild (Complex or Amino Acid) catabolic response and extracellular enzyme activities (EEA). EEA abbreviations are: Tyrosine aminopeptidase (TAP), Leucine aminopeptidase (LAP), and phenol oxidase (PO).



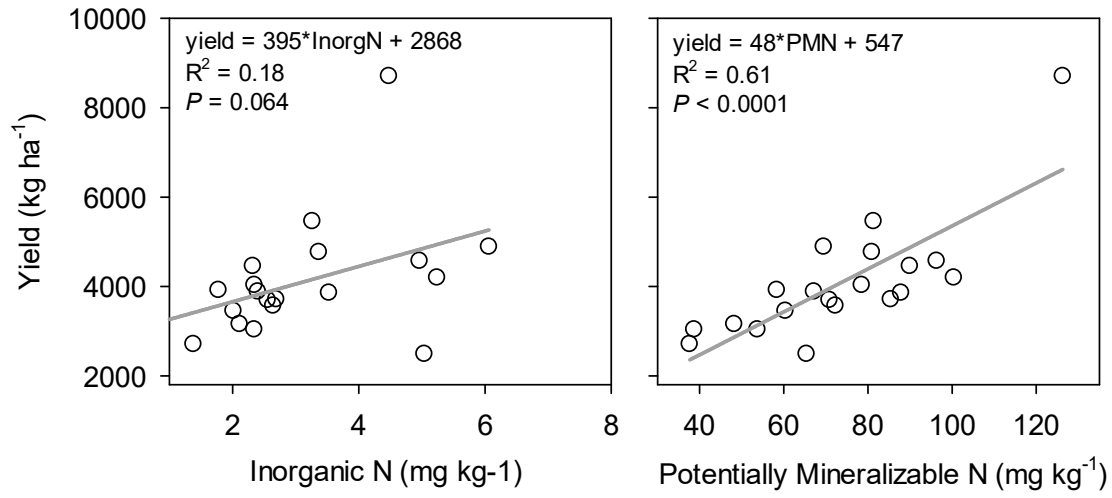

Figure S8. Relationships between spring soil nitrogen and 2012 yield in corn. *Note:* Inorganic N = NO<sub>3</sub><sup>-</sup>-N + NH<sub>4</sub>-N.

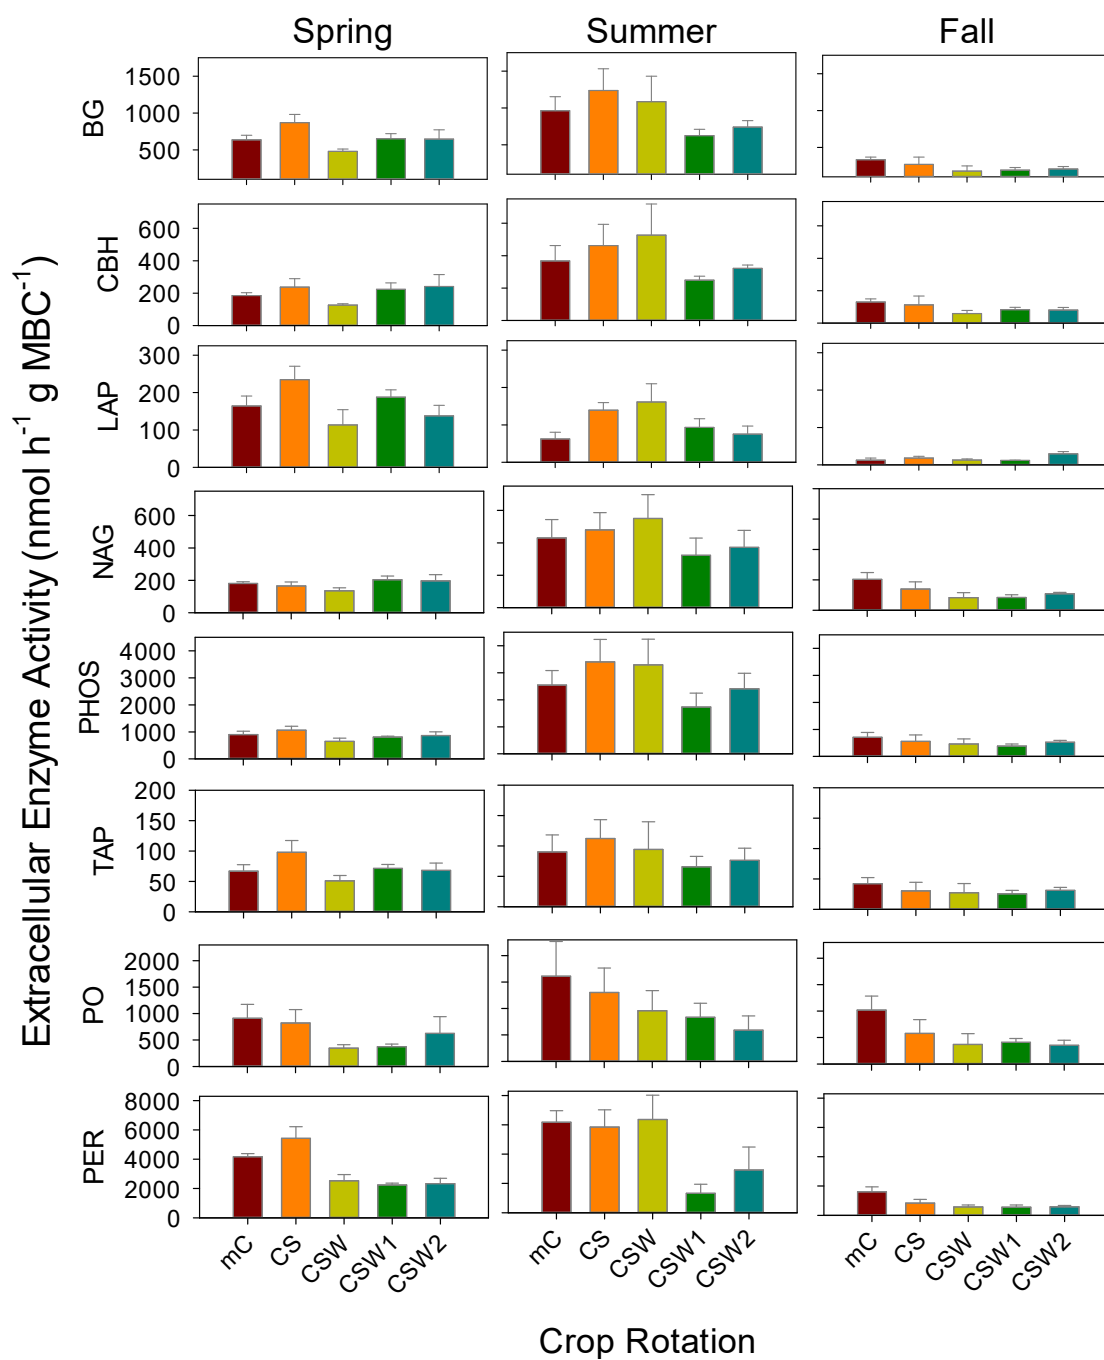

Figure S9. Soil extracellular enzyme activity expressed per unit of soil microbial biomass carbon (MBC). See Fig. S3 for crop rotation abbreviations. Means are shown and error bars are standard errors (n = 4).

Table S1. List of substrates used for the community-level physiological profile (CLPP).

| Substrate Name       | Abbreviation | Molecular weight | C:N  | Guild           |
|----------------------|--------------|------------------|------|-----------------|
| L-arginine           | Arg          | 216.238          | 1.5  | amino acid      |
| L-ascorbic acid      | Asc          | 176.124          |      | carboxylic acid |
| L-asparagine         | Asp          | 189.169          | 2    | amino acid      |
| caffeic acid         | Caf          | 180.175          |      | carboxylic acid |
| cellulose            | Cel          | 342.296          |      | complex         |
| citric acid          | Cit          | 192.124          |      | carboxylic acid |
| D-(+)-galactosamine  | Gal          | 215.623          | 6    | amine           |
| D-(+)-glucose        | Glc          | 180.16           |      | carbohydrate    |
| L-glutamine          | Glt          | 146.145          | 2.5  | amino acid      |
| glycine              | Gly          | 75.067           | 2    | amino acid      |
| guaiacol             | Gua          | 94.112           |      | complex         |
| L-histidine          | His          | 169.181          | 2    | amino acid      |
| humic acid           | Hum          | ???              |      | complex         |
| 2-ketobutyric acid   | Ket          | 102.089          |      | carboxylic acid |
| lactose              | Lac          | 342.296          |      | carbohydrate    |
| lignin               | Lig          | 534.508          |      | complex         |
| L-(+)-lysine         | Lys          | 146.188          | 3    | amino acid      |
| malic acid           | Mli          | 134.087          |      | carboxylic acid |
| malonic acid         | Mlo          | 104.061          |      | carboxylic acid |
| N-acetyl glucosamine | Nag          | 221.208          | 8    | amine           |
| oxalic acid          | Oxa          | 90.044           |      | carboxylic acid |
| pepsin               | Pep          | 672              | 5.6  | amine           |
| phenol               | Phe          | 94.112           |      | complex         |
| L-serine             | Ser          | 105.93           | 3    | amino acid      |
| syringic acid        | Syr          | 198.173          |      | carboxylic acid |
| tannic acid          | Tan          | 1701.2           |      | complex         |
| L-(+)-tartaric acid  | Tar          | 150.087          |      | carboxylic acid |
| D-(+)-trehalose      | Tre          | 378.27           |      | carbohydrate    |
| urea                 | Ure          | 60.055           | 0.5  | amine           |
| uric acid            | Uri          | 170.126          | 1.25 | amine           |
| vanillic acid        | Van          | 168.147          |      | carboxylic acid |

Table S2. Total MANOVA results for overall community-level physiological profile (and subsets of substrate additions).

| MANOVA <sup>§</sup>                     |             |              |                   |
|-----------------------------------------|-------------|--------------|-------------------|
|                                         | Factors     | F            | <i>P</i> value    |
| All Substrates                          |             |              |                   |
|                                         | Season      | <b>33.28</b> | <b>&lt; 0.001</b> |
|                                         | Rotation    | <b>2.19</b>  | <b>0.003</b>      |
|                                         | Season*Rot. | 0.65         | 0.949             |
| No Carboxylic Acids                     |             |              |                   |
|                                         | Season      | <b>17.98</b> | <b>&lt; 0.001</b> |
|                                         | Rotation    | <b>1.96</b>  | <b>0.012</b>      |
|                                         | Season*Rot. | 1.33         | 0.105             |
| Carboxylic Acids                        |             |              |                   |
|                                         | Season      | <b>21.37</b> | <b>&lt; 0.001</b> |
|                                         | Rotation    | <b>1.72</b>  | <b>0.035</b>      |
|                                         | Season*Rot. | 0.599        | 0.972             |
| Carboxylic Acids (no Ket <sup>‡</sup> ) |             |              |                   |
|                                         | Season      | <b>11.93</b> | <b>&lt; 0.001</b> |
|                                         | Rotation    | 1.27         | 0.207             |
|                                         | Season*Rot. | 0.69         | 0.917             |

§ Degrees of freedom: Season = 2, Rotation = 4, Season\*Rotation = 8.

‡ Ket = ketobutyric acid

Table S3. ANOVA and means comparisons of individual principal components.

| ANOVA <sup>§</sup><br>run | Parameter               | PC1                  |                   | PC2                         |                   | PC3                          |                   | PC4          |                   | PC5          |                   | Total |
|---------------------------|-------------------------|----------------------|-------------------|-----------------------------|-------------------|------------------------------|-------------------|--------------|-------------------|--------------|-------------------|-------|
| All Substrates            |                         |                      |                   |                             |                   |                              |                   |              |                   |              |                   |       |
|                           | Proportion of variance  | 38.7                 |                   | 17.7                        |                   | 14.5                         |                   | 9            |                   | 3.8          |                   | 83.7  |
|                           | ANOVA Factor            | F                    | <i>P</i> value    | F                           | <i>P</i> value    | F                            | <i>P</i> value    | F            | <i>P</i> value    | F            | <i>P</i> value    |       |
|                           | Season                  | <b>64.02</b>         | <b>&lt; 0.001</b> | <b>22.57</b>                | <b>&lt; 0.001</b> | <b>5.4</b>                   | <b>0.008</b>      | 0.68         | 0.510             | <b>10.33</b> | <b>&lt; 0.001</b> |       |
|                           | Rotation                | 0.69                 | 0.605             | <b>3.03</b>                 | <b>0.028</b>      | <b>12.82</b>                 | <b>&lt; 0.001</b> | 0.36         | 0.834             | 1.81         | 0.146             |       |
|                           | Season*Rot.             | 0.16                 | 0.995             | 1.22                        | 0.311             | 0.55                         | 0.81              | 0.88         | 0.544             | 0.27         | 0.973             |       |
|                           | Significant comparisons | 1=3≠2                |                   | 1=2≠3,<br>CS ≠ CSW1         |                   | 1=2≠3,<br>mC=CS≠CSW=CSW<br>2 |                   |              |                   | 1≠2=3,       |                   |       |
| No Carboxylic Acids       |                         |                      |                   |                             |                   |                              |                   |              |                   |              |                   |       |
|                           | Proportion of variance  | 39.3                 |                   | 18.2                        |                   | 11.1                         |                   | 6.8          |                   | 4.4          |                   | 79.8  |
|                           | ANOVA Factor            | F                    | <i>P</i> value    | F                           | <i>P</i> value    | F                            | <i>P</i> value    | F            | <i>P</i> value    | F            | <i>P</i> value    |       |
|                           | Season                  | <b>11.04</b>         | <b>&lt; 0.001</b> | <b>3.83</b>                 | <b>0.03</b>       | <b>24.6</b>                  | <b>&lt; 0.001</b> | 0.68         | 0.510             | <b>10.33</b> | <b>&lt; 0.001</b> |       |
|                           | Rotation                | <b>4.06</b>          | <b>0.007</b>      | <b>5.6</b>                  | <b>0.001</b>      | 0.58                         | 0.678             | 0.36         | 0.834             | 1.81         | 0.146             |       |
|                           | Season*Rot.             | 1.97                 | 0.075             | 0.7                         | 0.691             | 1.05                         | 0.419             | 0.88         | 0.544             | 0.27         | 0.973             |       |
|                           | Significant comparisons | 1=2≠3,<br>mC=CS≠CSW1 |                   | 2≠3,<br>mC=CS≠CSW1=C<br>SW2 |                   | 1≠2=3                        |                   |              |                   | 1≠2=3        |                   |       |
| Carboxylic Acids          |                         |                      |                   |                             |                   |                              |                   |              |                   |              |                   |       |
|                           | Proportion of variance  | 60.7                 |                   | 15.6                        |                   | 13.5                         |                   | 4            |                   | 2.3          |                   | 96.1  |
|                           | ANOVA Factor            | F                    | <i>P</i> value    | F                           | <i>P</i> value    | F                            | <i>P</i> value    | F            | <i>P</i> value    | F            | <i>P</i> value    |       |
|                           | Season                  | <b>200.2</b>         | <b>&lt; 0.001</b> | <b>5.19</b>                 | <b>0.01</b>       | 0.18                         | 0.84              | <b>12.33</b> | <b>&lt; 0.001</b> | 0.36         | 0.699             |       |
|                           | Rotation                | 1.8                  | 0.148             | 0.8                         | 0.532             | <b>0.03</b>                  | <b>0.026</b>      | 0.99         | 0.421             | <b>2.98</b>  | <b>0.031</b>      |       |
|                           | Season*Rot.             | 0.26                 | 0.976             | 1.16                        | 0.346             | 0.24                         | 0.98              | 0.51         | 0.84              | 0.48         | 0.864             |       |
|                           | Significant comparisons | 1≠2≠3                |                   | 1≠3                         |                   | mC≠CSW2                      |                   | 1≠2=3        |                   | CS≠CSW1      |                   |       |
